# Supplementary material for: Shape control and spectroscopy of crystalline BaZrO3 perovskite particles
Source: Royal Society of Chemistry journal article supplement (doi:10.1039/b616522b), 2007-01-01
Supplement: b616522b.pdf [file b616522b.pdf]

## Supporting Information

“Shape Control and Spectroscopy of Crystalline BaZrO<sub>3</sub> Perovskite Particles”

Hongjun Zhou,<sup>a</sup> Yuanbing Mao,<sup>a</sup> and Stanislaus S. Wong<sup>\*,a,b</sup>

<sup>a</sup>Department of Chemistry, State University of New York at Stony Brook, Stony Brook, NY 11794-3400

<sup>b</sup>Condensed Matter Physics and Materials Sciences Department, Brookhaven National Laboratory, Building 480;  
Upton, NY 11973

Email: [sswong@notes.cc.sunysb.edu](mailto:sswong@notes.cc.sunysb.edu); [sswong@bnl.gov](mailto:sswong@bnl.gov)

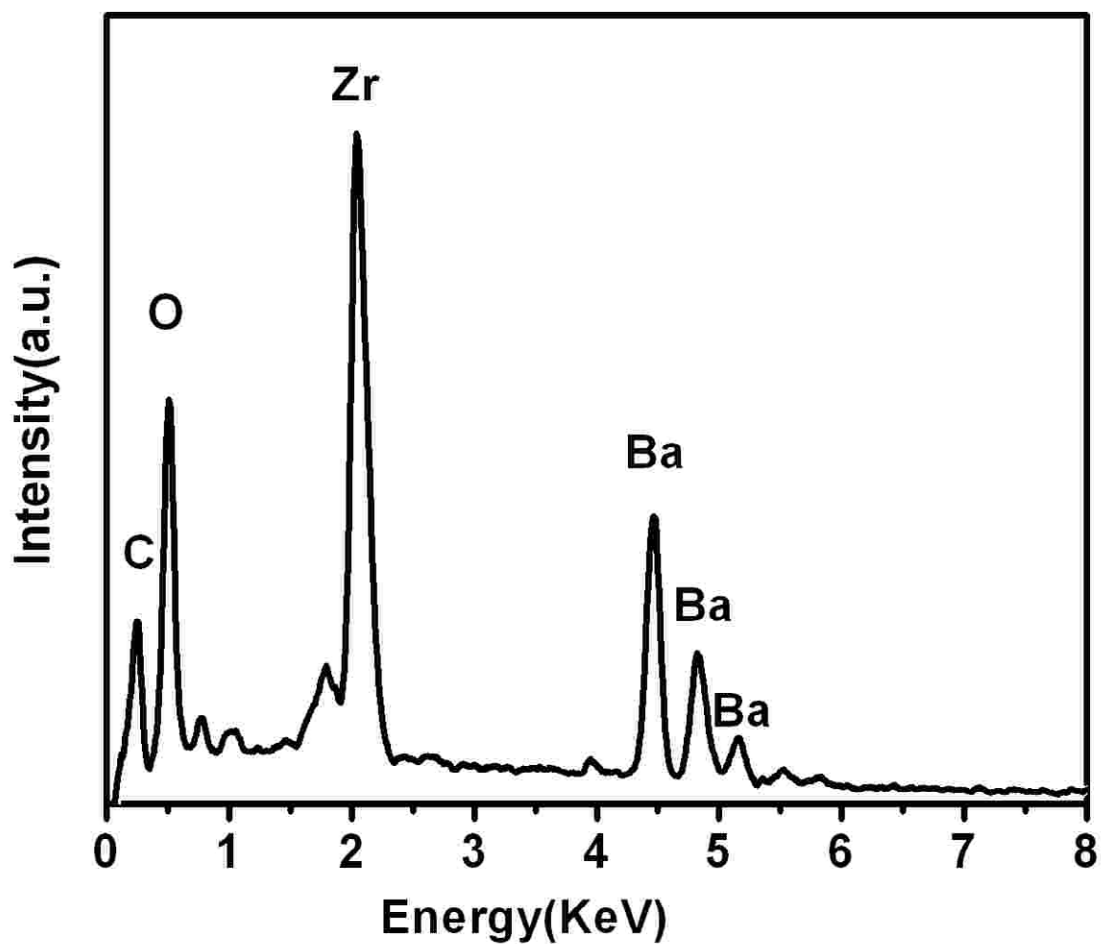

**Figure S1.** Representative EDS spectrum, associated with Figure 2, of as-prepared BaZrO<sub>3</sub> samples. Ba, Zr, and O signals are present, as expected. The C peak originates from the carbon tape used in the sample preparation for SEM.

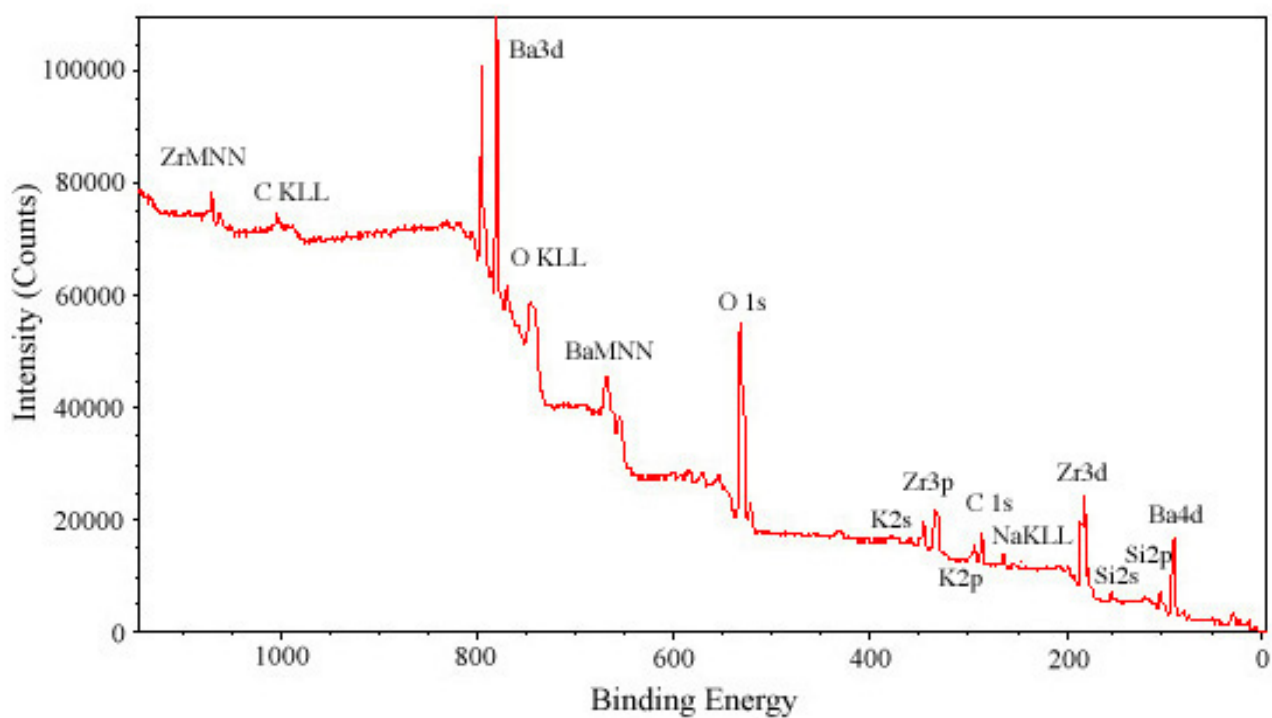

**Figure S2.** Survey X-ray photoelectron spectrum of representative, as-prepared samples of barium zirconate. Binding energy units are in eV.

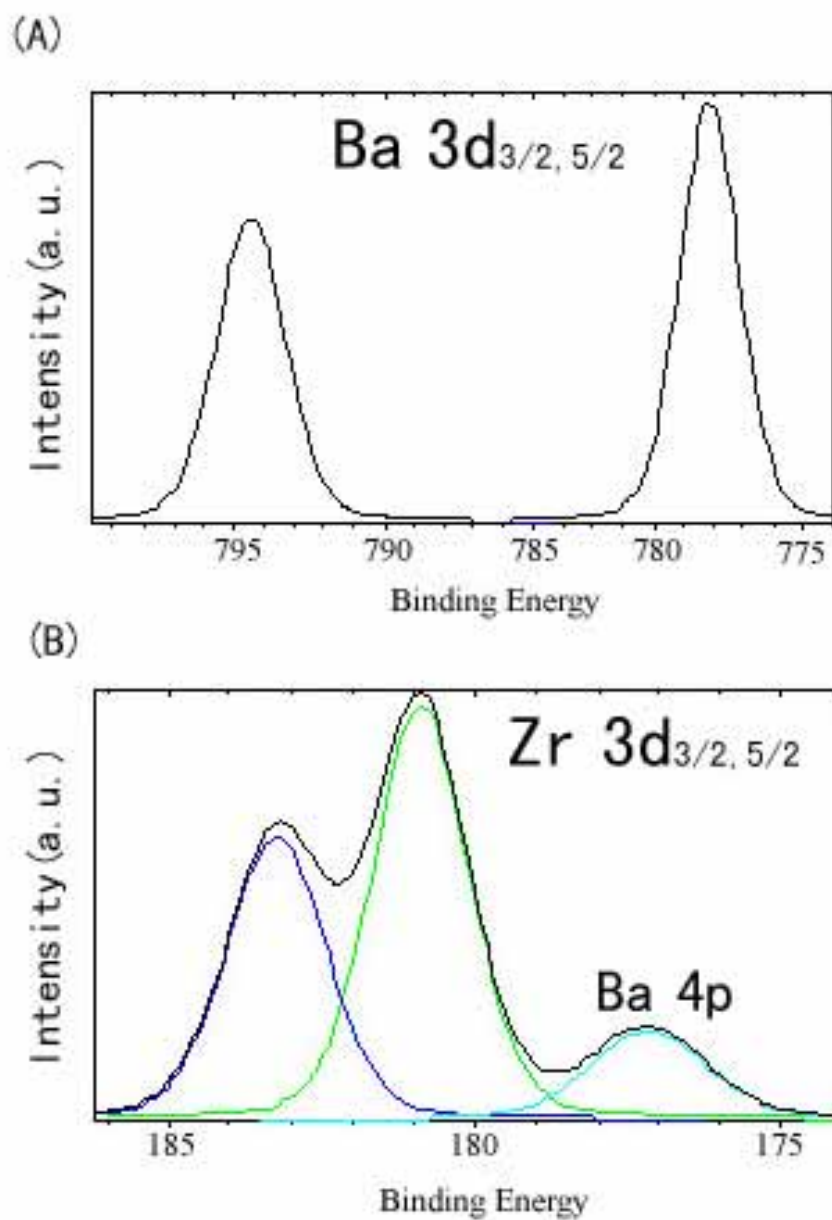

**Figure S3.** High-resolution X-ray photoelectron spectra of as-prepared samples of barium zirconate. Binding energy units are in eV. (A) Ba 3d spectrum. (B) Zr 3d spectrum.

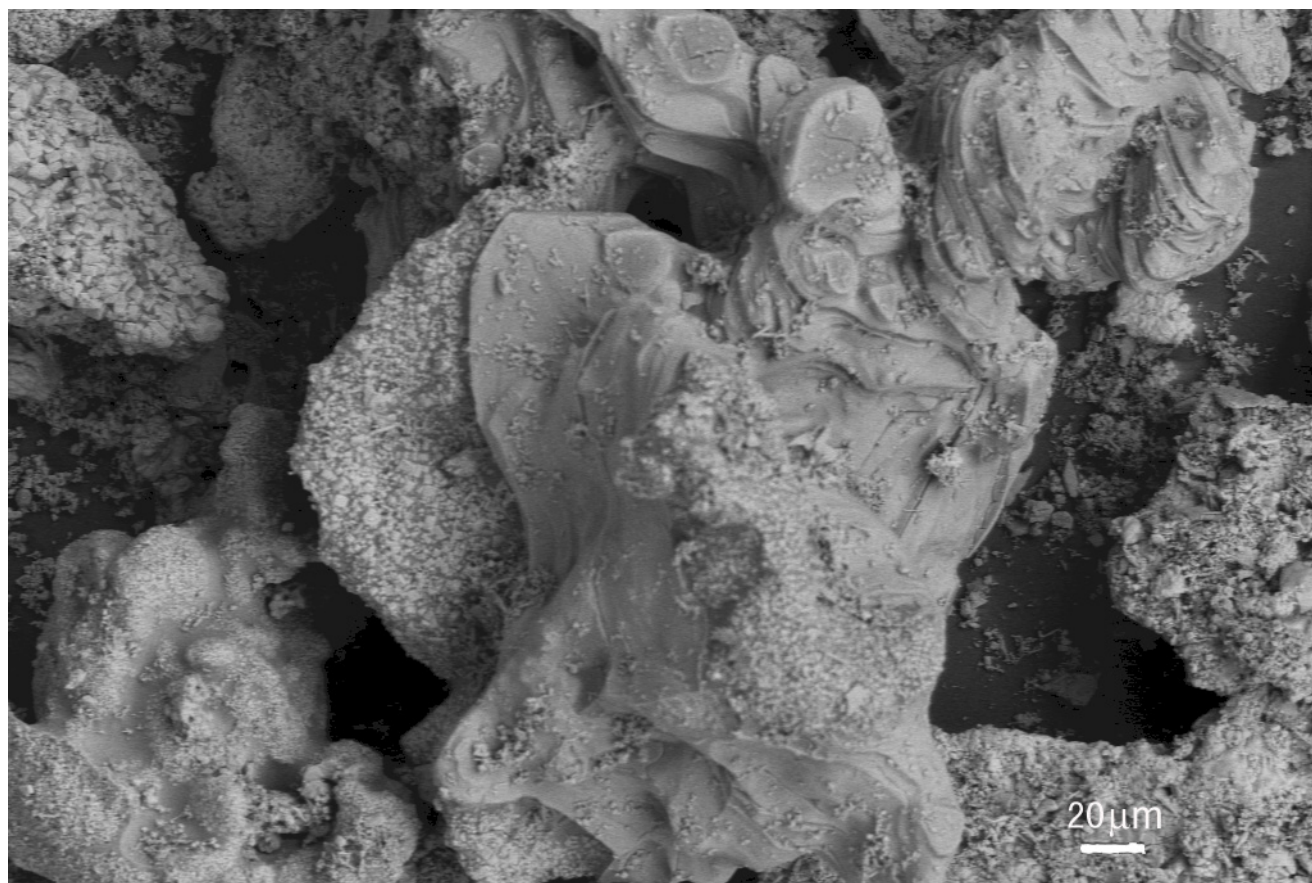

**Figure S4.** SEM image of an aggregated bulk sample of BaZrO<sub>3</sub>.
